# Supplementary material for: Achieving high-performance planar perovskite solar cell with Nb-doped TiO2 compact layer by enhanced electron injection and efficient charge extraction
Source: Royal Society of Chemistry journal article supplement (doi:10.1039/c6ta00989a), 2016-01-01
Supplement: c6ta00989a1.pdf [file c6ta00989a1.pdf]

## Electronic Supplementary Information

### **Achieving high-performance planar perovskite solar cell with Nb-doped TiO<sub>2</sub> compact layer by enhanced electron injection and efficient charge extraction**

Bai-Xue Chen, Hua-Shang Rao, Wen-Guang Li, Yang-Fan Xu, Hong-Yan Chen, Dai-Bin Kuang\* and Cheng-Yong Su

MOE Key Laboratory of Bio inorganic and Synthetic Chemistry, Lehn Institute of Functional Materials, School of Chemistry and Chemical Engineering, Sun Yat-sen University, Guangzhou 510275, P. R. China

\* Corresponding author.

Fax: (+86) 20-8411 3015.

E-mail: [kuangdb@mail.sysu.edu.cn](mailto:kuangdb@mail.sysu.edu.cn)

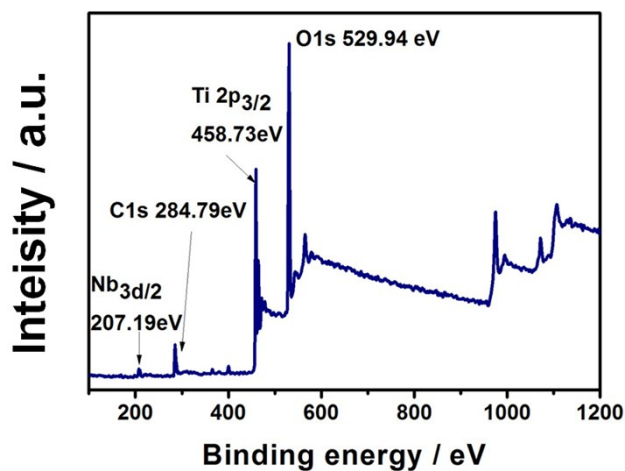

**Fig. S1.** XPS survey spectrum of 2% Nb-doped TiO<sub>2</sub>.

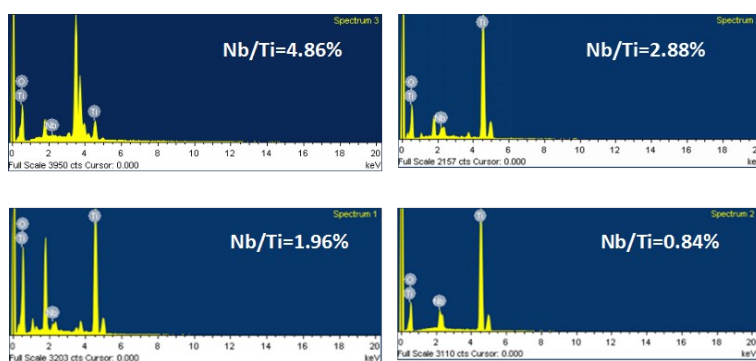

**Fig. S2.** Quantitative analysis of the content of Nb dopant by energy dispersive spectroscopy (EDS) whose theoretical molar ratio are 5%, 3%, 2% and 1%, respectively.

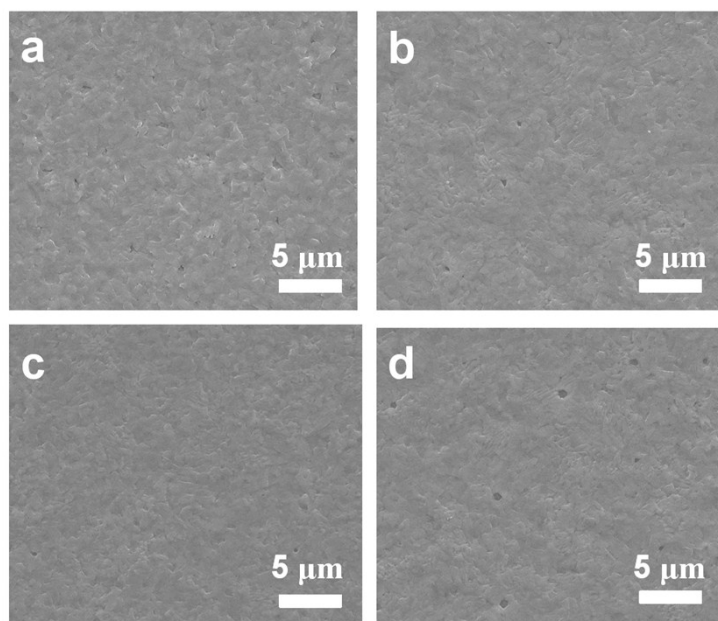

**Fig. S3.** The top-view SEM images of perovskite films deposited on pristine TiO<sub>2</sub> (a), 1% Nb-doped TiO<sub>2</sub> (b), 3% Nb-doped TiO<sub>2</sub> (c) and 5% Nb-doped TiO<sub>2</sub> (d), respectively. The number of pinholes in perovskite layer deposited on Nb-doped TiO<sub>2</sub> compact layer have first decreased from 0% to 2%, whereas retained nearly the same for 3% Nb doping. However, as the doping content increased to 5%, the pinholes turned to be more serious and the coverage of perovskite reduced sharply.

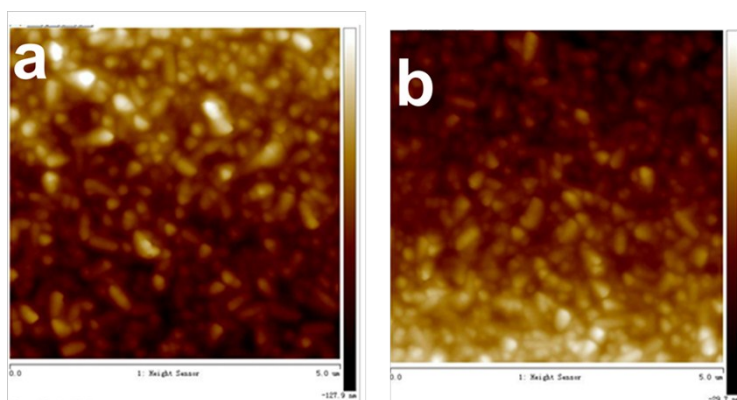

**Fig. S4.** AFM images of 2% Nb-doped TiO<sub>2</sub> (a), TiO<sub>2</sub> (b) films on FTO substrates with calculated roughness of 18.4 and 18.6, respectively.

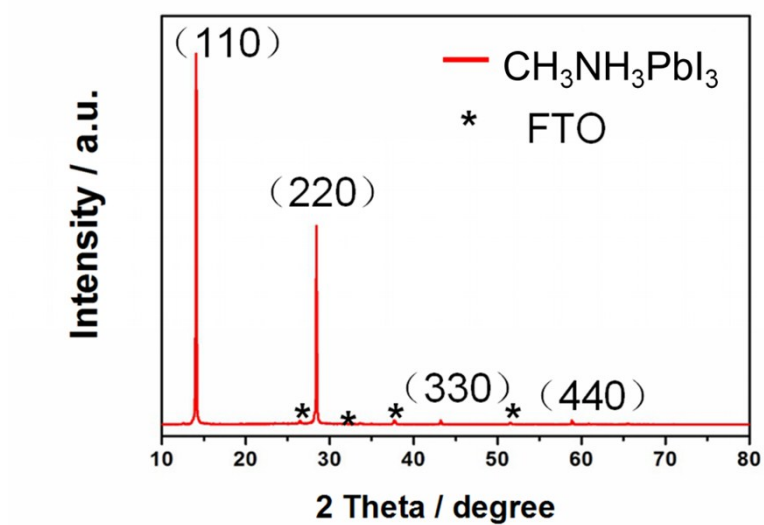

**Fig. S5.** XRD patterns of  $\text{CH}_3\text{NH}_3\text{PbI}_3$  film deposited on FTO substrate.

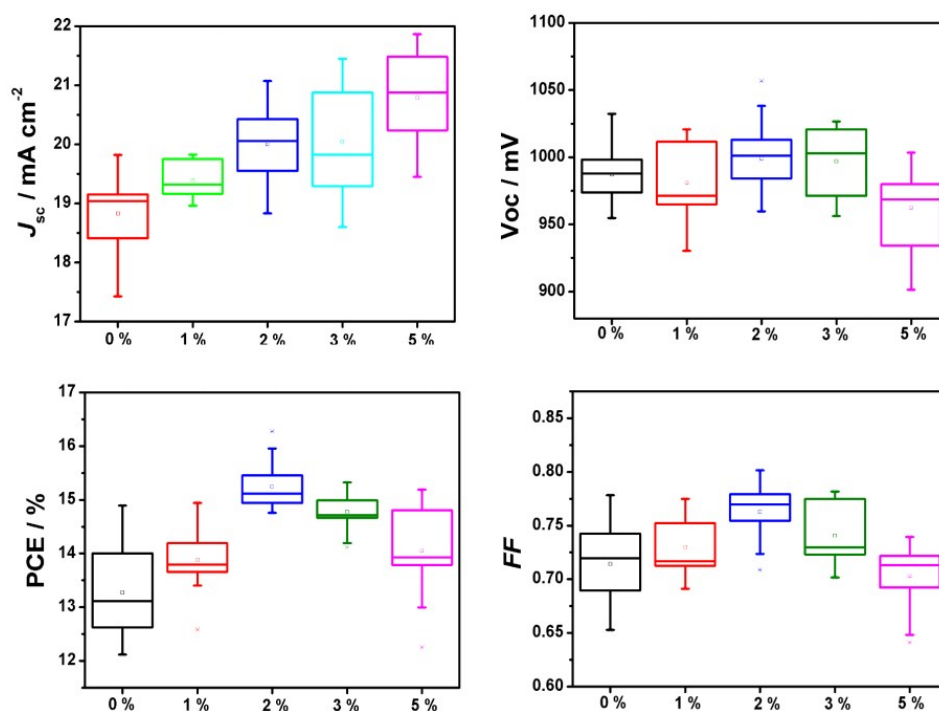

**Fig. S6.** The box-chart images of photovoltaic parameters which extracted from measuring current density-voltage curves for devices based on  $\text{TiO}_2$  with various Nb doping contents at simulated one sun illumination ( $100 \text{ mW cm}^{-2}$ , AM 1.5G).

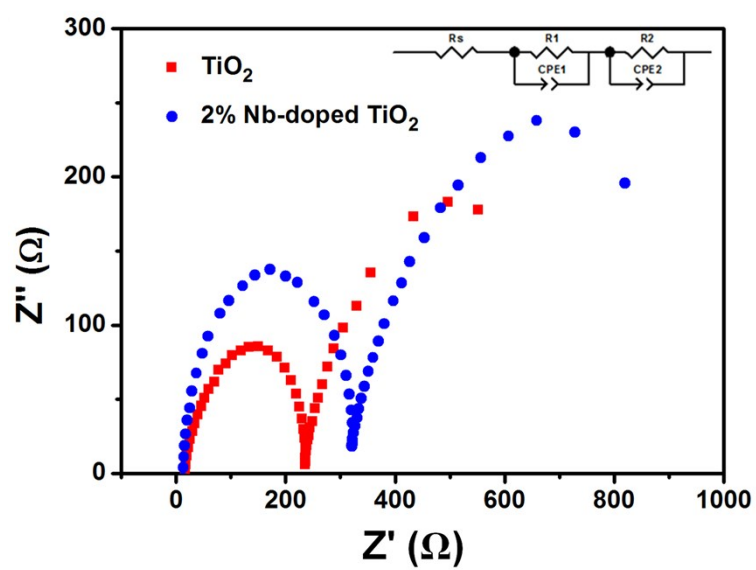

**Fig. S7.** Nyquist plot of the perovskite solar cells based on pristine  $\text{TiO}_2$  and 2% Nb-doped  $\text{TiO}_2$  compact layer at the open-circuit voltage under illumination ( $100 \text{ mW cm}^{-2}$ ).

**Table S1.** The photovoltaic parameters for PSC devices with 2% Nb-doped TiO<sub>2</sub> compact layer which extracted from measuring  $J$ - $V$  curves at simulated one sun illumination (100 mW cm<sup>-2</sup>, AM 1.5G) performed by FB-SC and SC-FB.

|                              | Direction | $J_{sc}$ / mA cm <sup>-2</sup> | $V_{oc}$ / mV | PCE / % | $FF$ |
|------------------------------|-----------|--------------------------------|---------------|---------|------|
| Pristine TiO <sub>2</sub>    | FB-SC     | 19.1                           | 955           | 13.1    | 0.72 |
|                              | SC-FB     | 19.1                           | 900           | 10.7    | 0.62 |
|                              | average   | 19.1                           | 928           | 11.9    | 0.67 |
| 2% Nb-doped TiO <sub>2</sub> | FB-SC     | 19.4                           | 992           | 15.2    | 0.79 |
|                              | SC-FB     | 19.4                           | 965           | 13.6    | 0.73 |
|                              | average   | 19.4                           | 979           | 14.4    | 0.76 |

**Table S2.** The fitted parameters for EIS measurements acquired under 1 sun illumination at open-circuit potential.

|                              | $R_s$ / $\Omega$ cm <sup>2</sup> | $R_{rec}$ / $\Omega$ cm <sup>2</sup> |
|------------------------------|----------------------------------|--------------------------------------|
| TiO <sub>2</sub>             | 17.8                             | 610.1                                |
| 2% Nb-doped TiO <sub>2</sub> | 8.7                              | 691.5                                |
